# Supplementary material
Source: PubMed Central journal article supplement (PMC3018347)
Supplement: pr100688h_si_001.pdf [file pr100688h_si_001.pdf]

## Supporting Information

**SI Table 1. Comparison of in-solution digestion and Tube-Gel digestion of phagosome membrane extracts.<sup>a</sup>**

| Digestion Condition | 0.01 % SDS, dual enzymes <sup>b</sup> | 0.2% SDS, trypsin alone | 0.2% SDS, dual enzymes | Gel-assisted digestion |
|---------------------|---------------------------------------|-------------------------|------------------------|------------------------|
| Trial 1             | 3                                     | 13                      | 20                     | 64                     |
| Trial 2             | 5                                     | 18                      | 26                     | 69                     |
| Trial 3             | 4                                     | 13                      | 17                     | 60                     |

<sup>a</sup> The number of protein IDs from each digestion product was used for assessment of digestion efficiency.

<sup>b</sup> Dual enzyme treatment involved Lys-C digestion prior to tryptic digestion.

**SI Table 2A. Proteins identified in the macrophage phagosomal membrane in this study**

**SI Table 2B. Quantitative ratios of phagosomal proteins found in two experiments using QSTAR Pulsar or Elite MS**

**SI Table 3. Overlapping and unique IDs from data sets generated by our new platform or the conventional method**
