# Supplementary material
Source: PubMed Central journal article supplement (PMC3018347)

**SI Figure 1. Specific staining of ManLAM-coated microbeads by the FITC-conjugated lectin Concanavalin-A (left). PILAM-coated beads shows minimal signal (right).**

**SI Figure 2. Comparison of phagosomal membrane proteomic data acquired using the platform described in this paper vs the previously described gel-based method.** (A) Venn diagram of total protein IDs from phagosome membranes using this new platform and the conventional one we employed earlier. (B) Histogram of the number of predicted transmembrane helices in proteins identified either by two methods (overlapping) or one method (unique).

**SI Figure 3. Lipoglycan treatment does not affect cell viability.** Trypan blue assay was carried out on each cell population after 2 h incubation of chloroquine (CQ) and a given lipoglycan. CQ: 50  $\mu$ M, ManLAM: 20  $\mu$ g/ml, PILAM: 20  $\mu$ g/ml, LPS: 0.1  $\mu$ g/ml. Data are means from two separate experiments.

SI Fig. 1

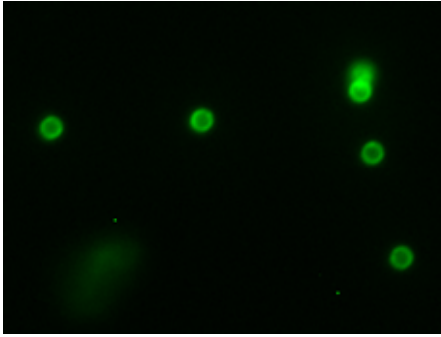

ManLAM-coated  
microbeads

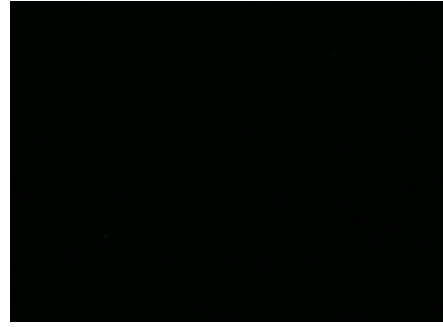

PILAM-coated  
microbeads

SI Fig.2

(A)

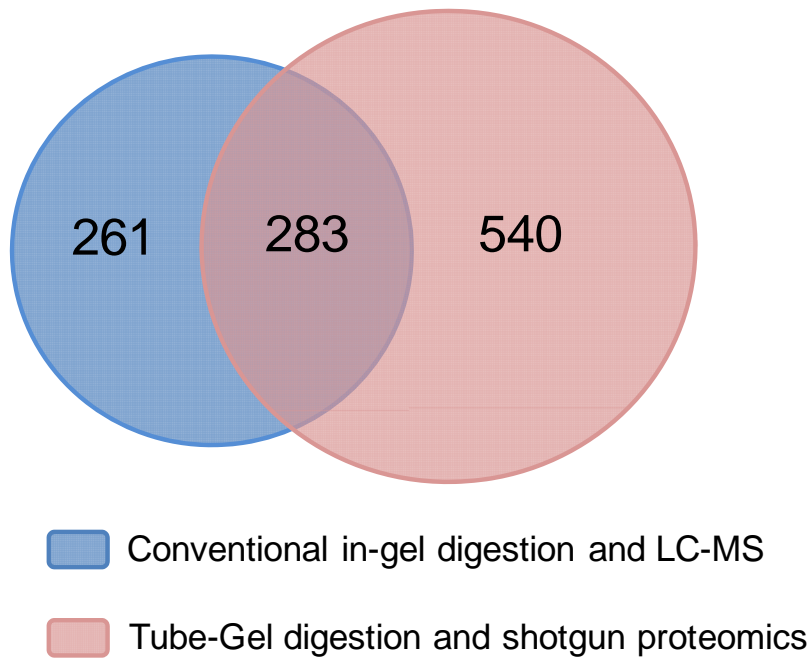

(B)

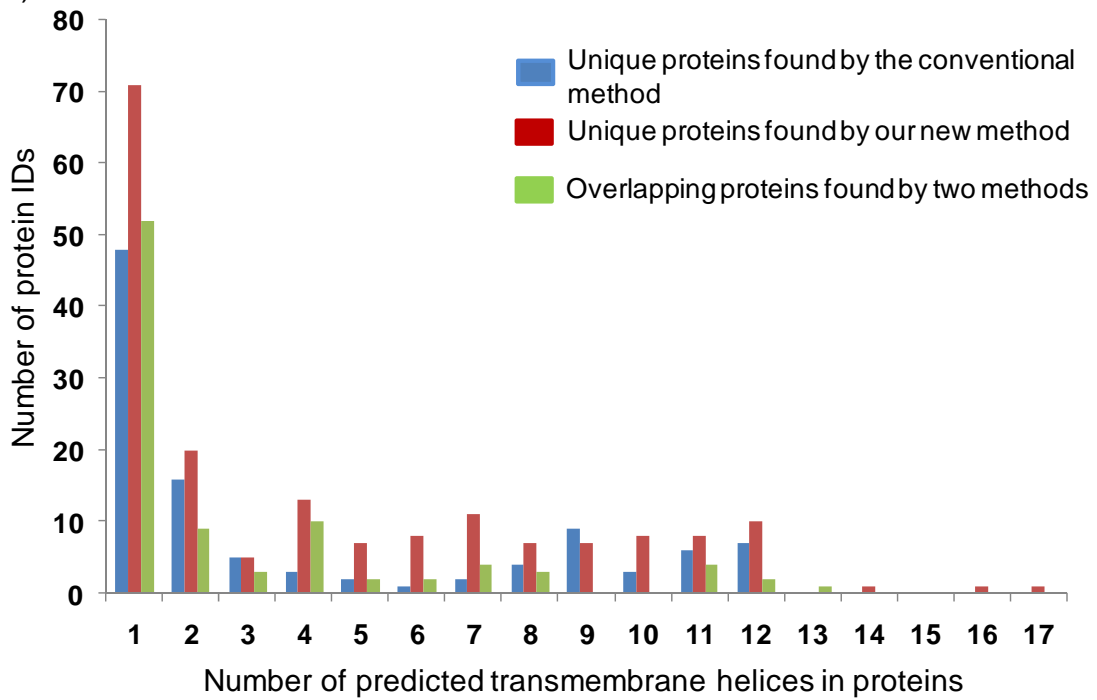

SI Fig. 3

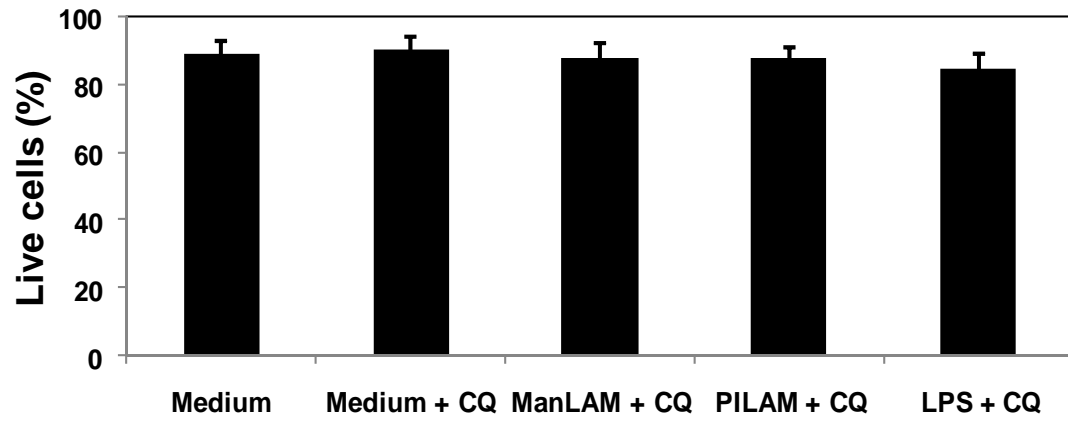

Supplement: pr100688h_si_004.pdf [file pr100688h_si_004.pdf]
